# Supplementary material for: Visualising G-quadruplex DNA dynamics in live cells by fluorescence lifetime imaging microscopy
Source: PubMed Central journal article supplement (PMC7794231; doi:10.1038/s41467-020-20414-7), 2021-01-08
Supplement: 41467_2020_20414_MOESM1_ESM.pdf [file 41467_2020_20414_MOESM1_ESM.pdf]

# Visualising G-quadruplex DNA dynamics in live cells by fluorescence lifetime imaging microscopy

## Supplementary Information

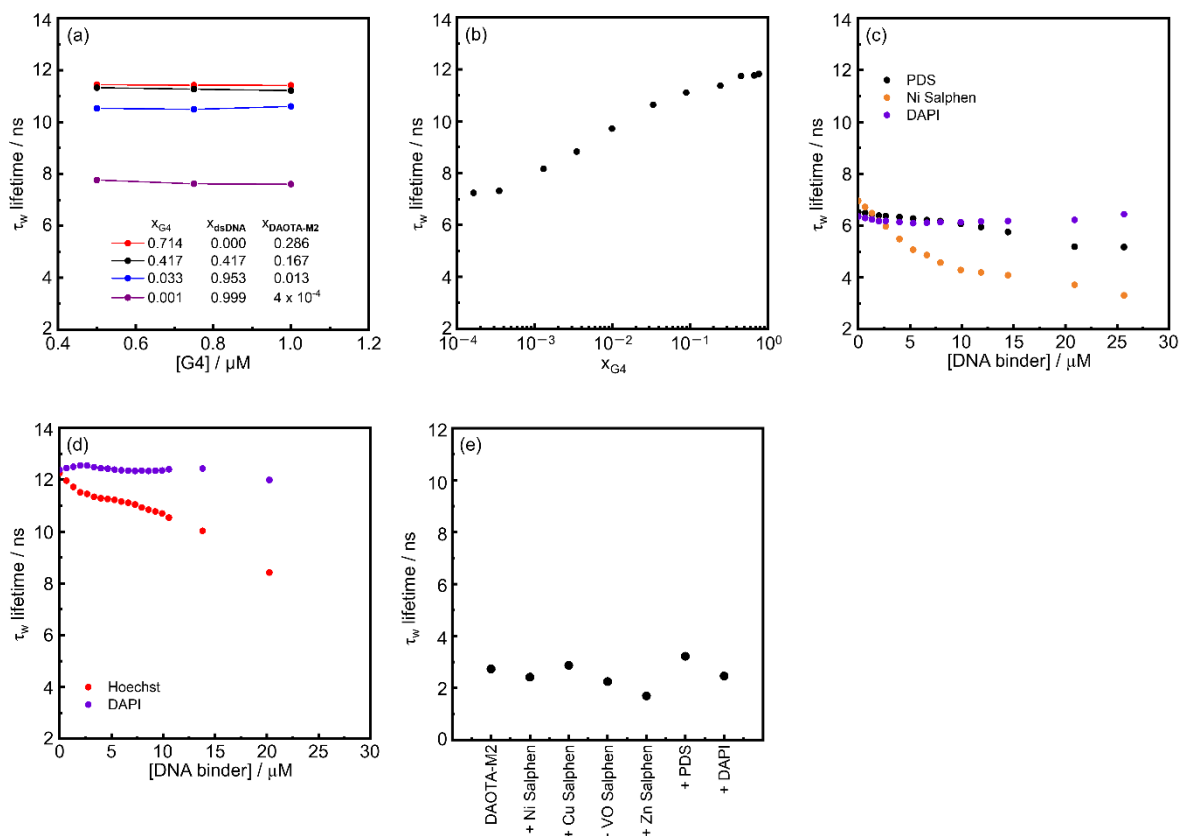

**Supplementary Figure 1.** *In vitro* fluorescence-lifetime of **DAOTA-M2** bound to different DNA topologies. (a) Mixtures of **DAOTA-M2**, dsDNA (CT-DNA) and G4 (*c-Myc*) at different dilutions display the same average lifetime ( $\tau_w$ ) values.  $X_{G4}$ ,  $X_{dsDNA}$  and  $X_{DAOTA-M2}$  indicate the molar ratio of each component. (b) Titration of dsDNA into a mixture of **DAOTA-M2** (0.2  $\mu\text{M}$ ) and G4 (*c-Myc*, 1  $\mu\text{M}$ ) results in a fluorescence lifetime decrease from *ca.* 12 ns (G4 DNA) to *ca.* 7 ns (dsDNA). (c) Variation of  $\tau_w$  in a mixture of **DAOTA-M2** (2  $\mu\text{M}$ ), dsDNA (CT-DNA, 50  $\mu\text{M}$ ), with increasing concentrations of G4 binders PDS (black dots) and Ni-salphen (orange dots), and a non-G4 binder DAPI (purple dots). This drop in  $\tau_w$  when using Ni-salphen is likely results from displacement of **DAOTA M2** from dsDNA or quenching of **DAOTA M2** at high Ni-salphen DNA loading. (d) Variation of  $\tau_w$  in a mixture of **DAOTA-M2** (2  $\mu\text{M}$ ) and G4 (*c-Myc*, 4  $\mu\text{M}$ ), with increasing concentrations of Hoechst 33258 (red dots) and DAPI (purple dots). We chose to use DAPI as a control rather than Hoechst, as displacement of **DAOTA-M2** from G4 could be observed when using Hoechst [Figure S1(d)]. (e)  $\tau_w$  value of **DAOTA-M2** (2  $\mu\text{M}$ ) and with the addition of 20  $\mu\text{M}$  DNA binding compounds in this study. Results of one experiment. All experiments in 10 mM lithium cacodylate buffer (pH 7.3) with 100 mM KCl.

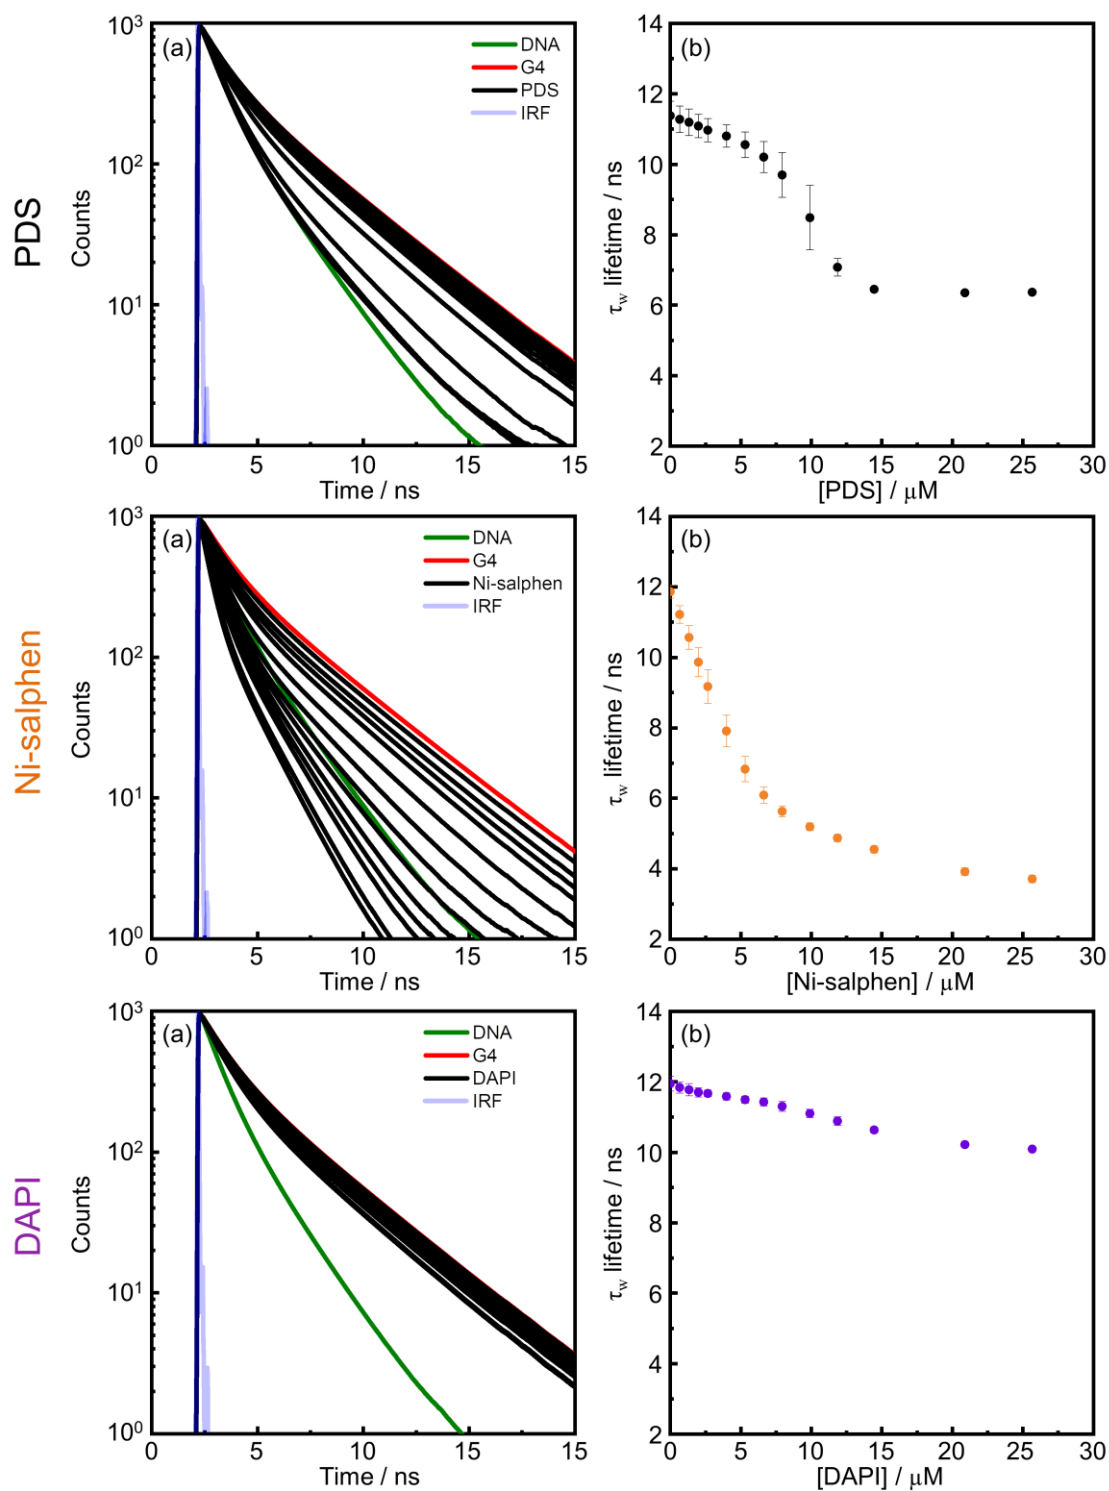

**Supplementary Figure 2.** *In vitro* fluorescence-lifetime indicator displacement assays (FLIDA) using **DAOTA-M2**. (a) Representative examples of fitted lifetime decays of **DAOTA-M2** (2 μM) following the subsequent additions of dsDNA (CT-DNA, 20 μM, green trace) and then G4 (*c-Myc*, 4 μM, red trace). Increasing amounts of PDS (top) Ni-salphen (middle) and DAPI (bottom) at 0.7, 1.3, 2.0, 2.7, 4.0, 5.3, 6.6, 7.9, 9.9, 11.9, 14.5, 20.9 and 25.7 μM (black traces). (b) Variation of average lifetime ( $\tau_w$ ) with increasing concentrations of G4 binders PDS (black dots, top) and Ni-salphen (orange dots, middle), and a non-G4 binder DAPI (purple dots, bottom). Mean value is plotted; error bars represent the standard deviation of three independent experiments. All experiments in 10 mM lithium cacodylate buffer (pH 7.3) with 100 mM KCl.

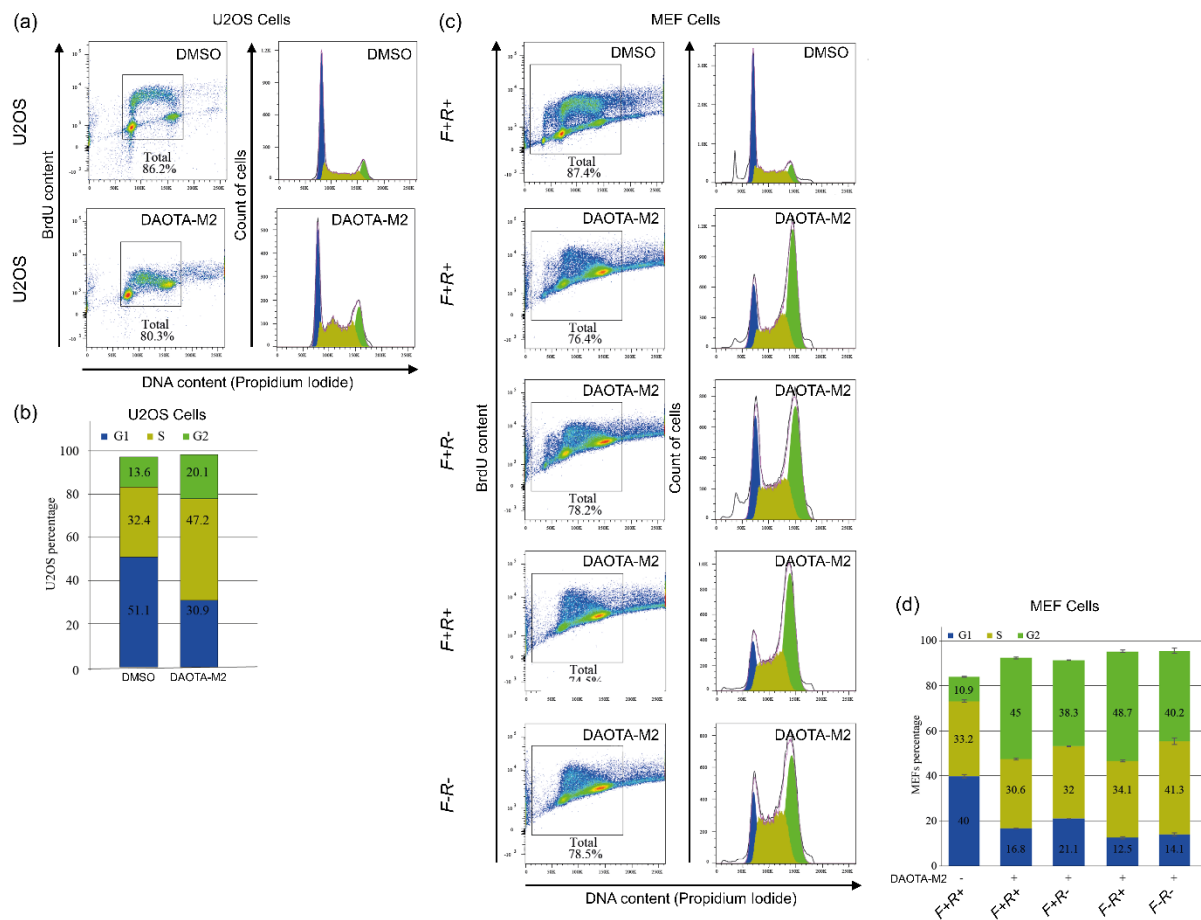

**Supplementary Figure 3.** Fluorescence-activated cell sorting (FACS) analysis of U2OS and MEF cells before and after incubation with **DAOTA-M2** (20  $\mu$ M, 24 h). For MEF cells,  $F+R+ = FancJ(+)/RTEL1(+)$ ,  $F+R- = FancJ(+)/RTEL1(-)$ ,  $F-R+ = FancJ(-)/RTEL1(+)$ , and  $F-R- = FancJ(-)/RTEL1(-)$ . Blue indicates G1, yellow indicates S and green indicates G2 phase. (a) FACS of U2OS cells. (b) percent of U2OS cells in G1, S and G2. (c) FACS of MEF cells. Cells were infected with CRE adenovirus (R-) to delete RTEL1, or infected with Null virus (R+). (d) percent of MEF cells in G1, S and G2, value is given as a mean with error bars showing standard deviation from three technical replicates.

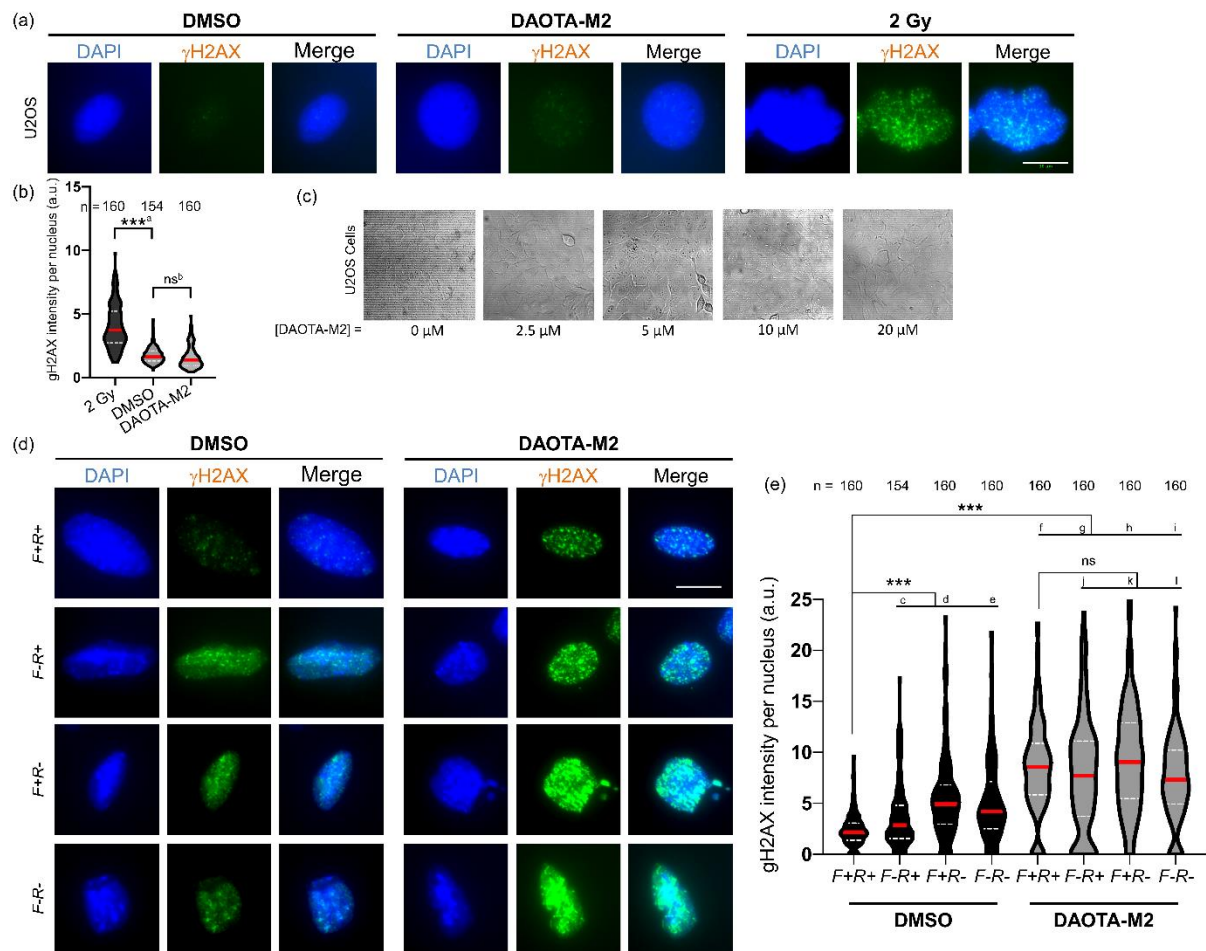

**Supplementary Figure 4.**  $\gamma$ H2AX immunostaining (green) for DNA damage response (DDR) in U2OS and MEF cells, with/without incubation with **DAOTA-M2** (20  $\mu$ M, 24 hr). Cell nuclei are stained blue using DAPI. *F+R+* = *FancJ*(+)/*RTEL1*(+), *F+R-* = *FancJ*(+)/*RTEL1*(-), *F-R+* = *FancJ*(-)/*RTEL1*(+), and *F-R-* = *FancJ*(-)/*RTEL1*(-). (a) fluorescence images of U2OS cells with/without **DAOTA-M2**, and 2 Gy gamma irradiation as a positive control, representative of the cells from (b). (b) no difference in  $\gamma$ H2AX foci before and after incubation. Results from n cells as stated next to each box, over one experiment. (c) brightfield images (using a 20x objective) of confluent U2OS cells after incubation with **DAOTA-M2** for 24 hr at 0, 2.5, 5, 10 and 20  $\mu$ M reveal no morphological differences. (d) fluorescence images of MEF cells in this study with/without **DAOTA-M2**, representative of the cells from (e). Cells were infected with CRE adenovirus (*R-*) to delete *RTEL1*, or left without infection(*R+*). (e) DDR is activated in MEF cells deficient in *FancJ* and/or *RTEL1*. Incubation with **DAOTA-M2** increases  $\gamma$ H2AX foci. Results from n cells as stated next to each box, over one experiment. Scale bars: 10  $\mu$ m. Significance: ns p > 0.05, \* p < 0.05, \*\* p < 0.01, \*\*\* p < 0.001. <sup>a</sup> p =  $9.4 \times 10^{-35}$ , t = 15.3, DF = 175. <sup>b</sup> p =  $1.1 \times 10^{-1}$ , t = 1.5, DF = 235. <sup>c</sup> p =  $1.2 \times 10^{-5}$ , t = -4.5, DF = 221. <sup>d</sup> p =  $4.1 \times 10^{-17}$ , t = -9.2, DF = 204. <sup>e</sup> p =  $8.4 \times 10^{-14}$ , t = -9.0, DF = 203. <sup>f</sup> p =  $5.9 \times 10^{-38}$ , t = -16.2, DF = 196. <sup>g</sup> p =  $5.5 \times 10^{-24}$ , t = -11.7, DF = 183. <sup>h</sup> p =  $1.2 \times 10^{-37}$ , t = -16.3, DF = 187. <sup>i</sup> p =  $1.9 \times 10^{-31}$ , t = -14.0, DF = 197. <sup>j</sup> p =  $2.3 \times 10^{-1}$ , t = 1.2, DF = 303. <sup>k</sup> p =  $1.3 \times 10^{-1}$ , t = -1.5, DF = 312. <sup>l</sup> p =  $8.2 \times 10^{-2}$ , t = 1.7, DF = 318.

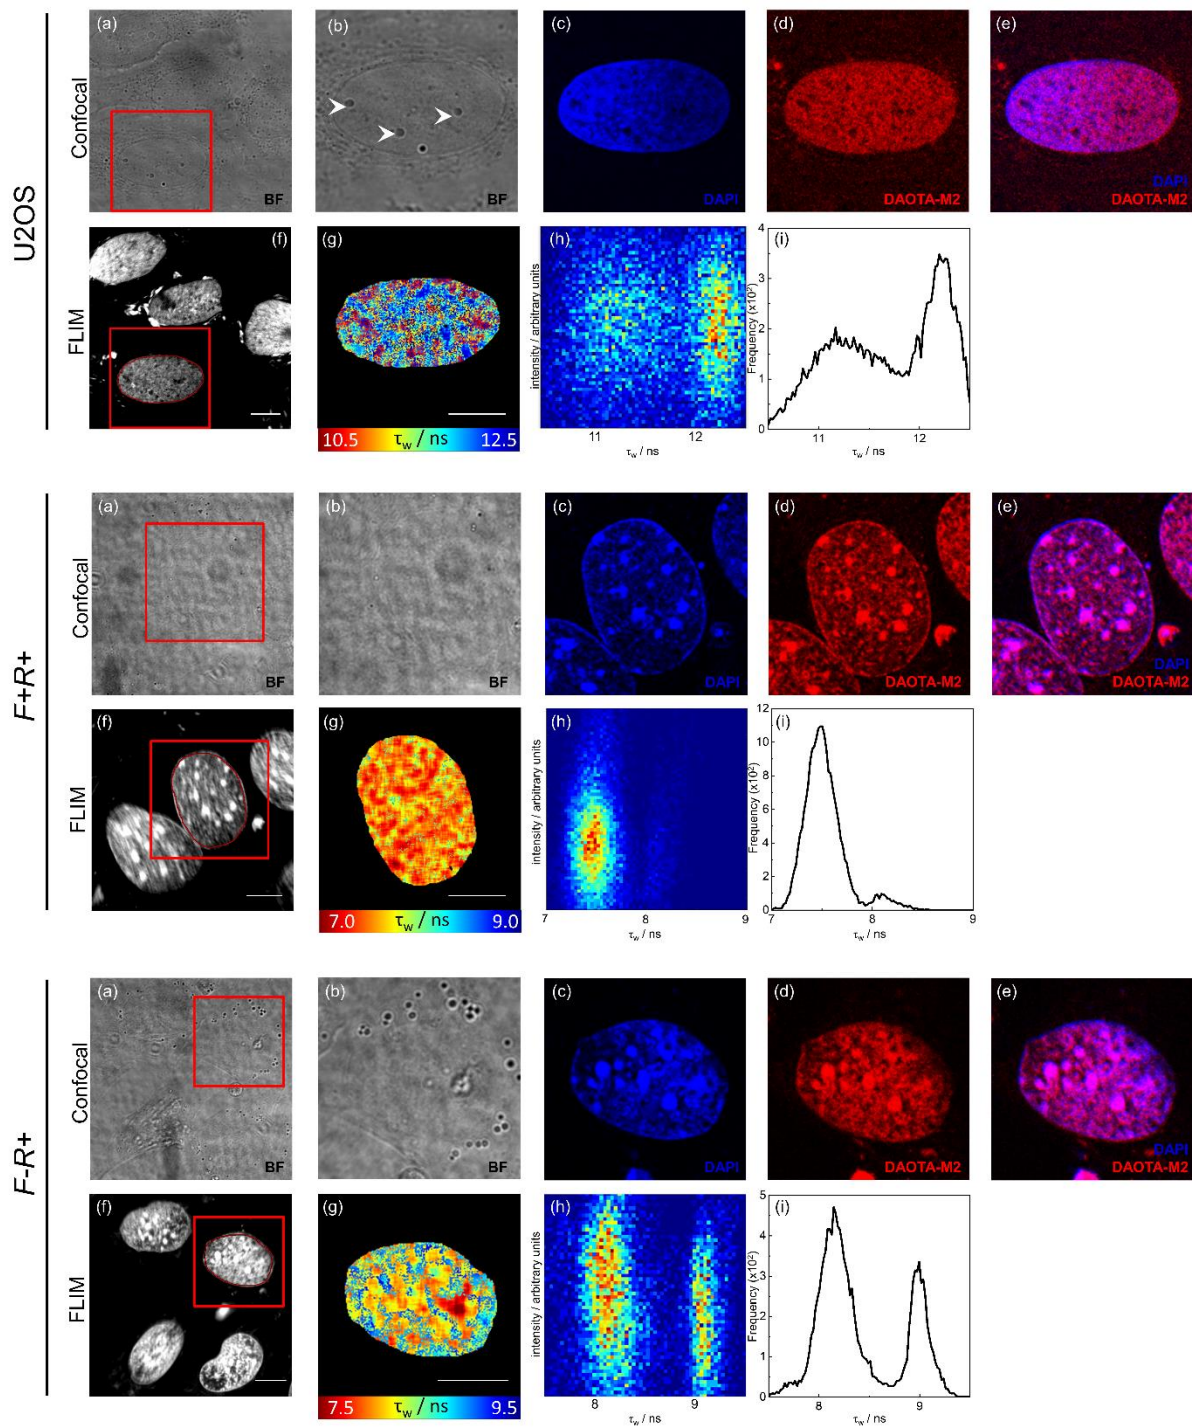

**Supplementary Figure 5.** FLIM analysis and chromatin staining of live U2OS/MEF cells using **DAOTA-M2** (20  $\mu$ M, 24 hr) and **DAPI** (90  $\mu$ M, 1 hr).  $F+R+ = FancJ(+)/RTEL1(+)$ ,  $F+R- = FancJ(+)/RTEL1(-)$ ,  $F-R+ = FancJ(-)/RTEL1(+)$ , and  $F-R- = FancJ(-)/RTEL1(-)$ . (a) Brightfield (BF) image. (b) zoomed in BF image of the red square ROI in (a), nucleoli features are marked with a white arrow (top). (c) DAPI emission highlighting chromatin staining (blue). (d) **DAOTA-M2** emission (red). (e) merge of DAPI and **DAOTA-M2** emission, confirming co-localisation of fluorescence intensity. (f) Fluorescence intensity image recorded at 512 x 512 resolution, the red line represents the nuclear segmentation used for the FLIM analysis. (g) FLIM map of ROI in (b)-(e). Lifetime represented by colour scale from 7.5 (red) to 9.5 (blue) ns. (h) 2D correlation of the intensity in each pixel against average lifetime ( $\tau_w$ ) for the nucleus in (g), showing no correlation. (i) Histogram of fluorescence lifetime distribution in (g). Cells shown are

representative of 11 cells (U2OS), 5 cells (F+R+) and 6 cells (F+R+) respectively imaged similarly. Scale bars: 10  $\mu$ m.



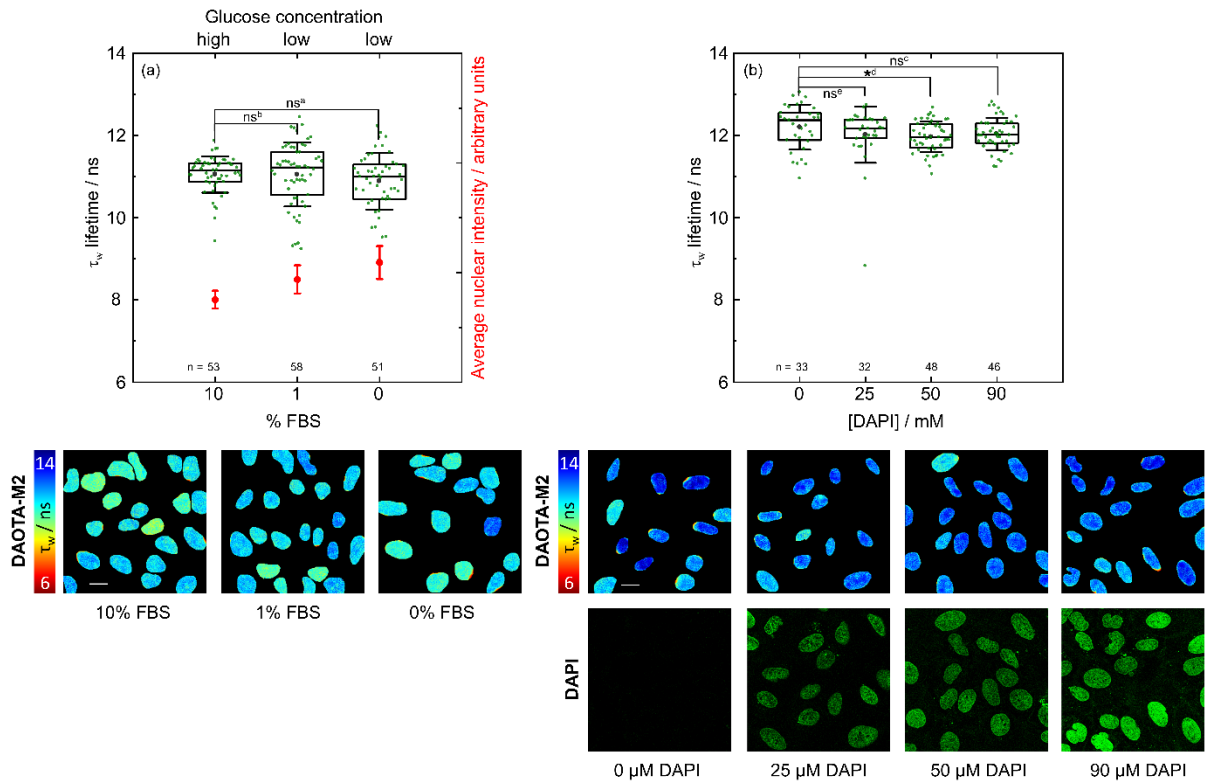

**Supplementary Figure 6.** FLIM analysis of nuclear DNA in live U2OS cells stained with **DAOTA-M2** (20 μM, 24-30 hr) in (a) different media conditions and (b) with different DAPI concentrations. Top: (a) Box plot of mean nuclear lifetimes ( $\tau_w$ , left axis, black), and average nuclear intensity (right axis, red) and conditions of **DAOTA-M2** incubation: High glucose (4500 mg L<sup>-1</sup>) with 10% FBS, low glucose (1350 mg L<sup>-1</sup>) with 1% FBS, and low glucose (1000 mg L<sup>-1</sup>) with 0% FBS. Error bars represent the standard deviation. Results from n cells as stated next to each box, over one experiment. (b) Box plot of mean nuclear lifetimes ( $\tau_w$ ) measured following co incubation with 0, 25, 50 and 90 μM DAPI for 1 h. Results from n cells as stated next to each box, over one experiment. Bottom: Representative **DAOTA-M2** ( $\lambda_{ex}$  = 488 nm,  $\lambda_{em}$  = 550-700 nm) FLIM maps from the box plots above. Where applicable, DAPI emission (green,  $\lambda_{ex}$  = 760 nm,  $\lambda_{em}$  = 400-500 nm) is shown alongside. Colour scale shows lifetime from 6 (red) to 14 (blue) ns. Scale bars: 20 μm. Results of one experiment. Significance: ns p > 0.05, \* p < 0.05, \*\* p < 0.01, \*\*\* p < 0.001. <sup>a</sup> p = 1.4 × 10<sup>-1</sup>, t = 1.48, DF = 85; <sup>b</sup> p = 9.7 × 10<sup>-1</sup>, t = 0.03, DF = 92, <sup>c</sup> p = 2.4 × 10<sup>-1</sup>, t = 1.20, DF = 59, <sup>d</sup> p = 3.5 × 10<sup>-2</sup>, t = 2.16, DF = 52, <sup>e</sup> p = 1.4 × 10<sup>-1</sup>, t = 1.49, DF = 55

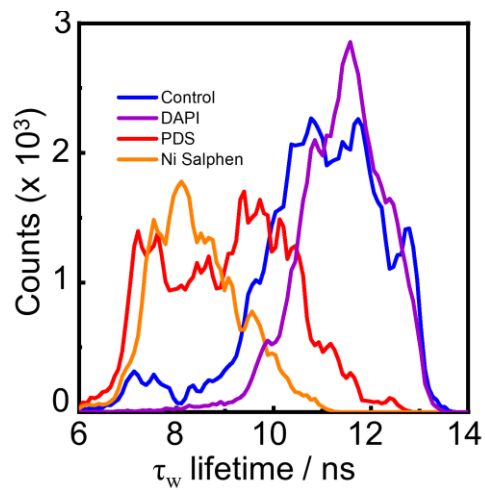

**Supplementary Figure 7.** FLIM analysis of nuclear DNA in live U2OS cells stained with **DAOTA-M2** (20  $\mu\text{M}$ , 24-30 hr), and co-incubated with G4 and non-G4 binders. Histograms of fluorescence lifetime ( $\tau_w$ ) distribution after co-incubation with: no additive (Control, blue), DAPI (purple, 50  $\mu\text{M}$ , 1 hr), Ni-salphen (orange, 1  $\mu\text{M}$ , 6 hr), and PDS (red, 10  $\mu\text{M}$ , 24 hr). Results of 2 independent experiments.



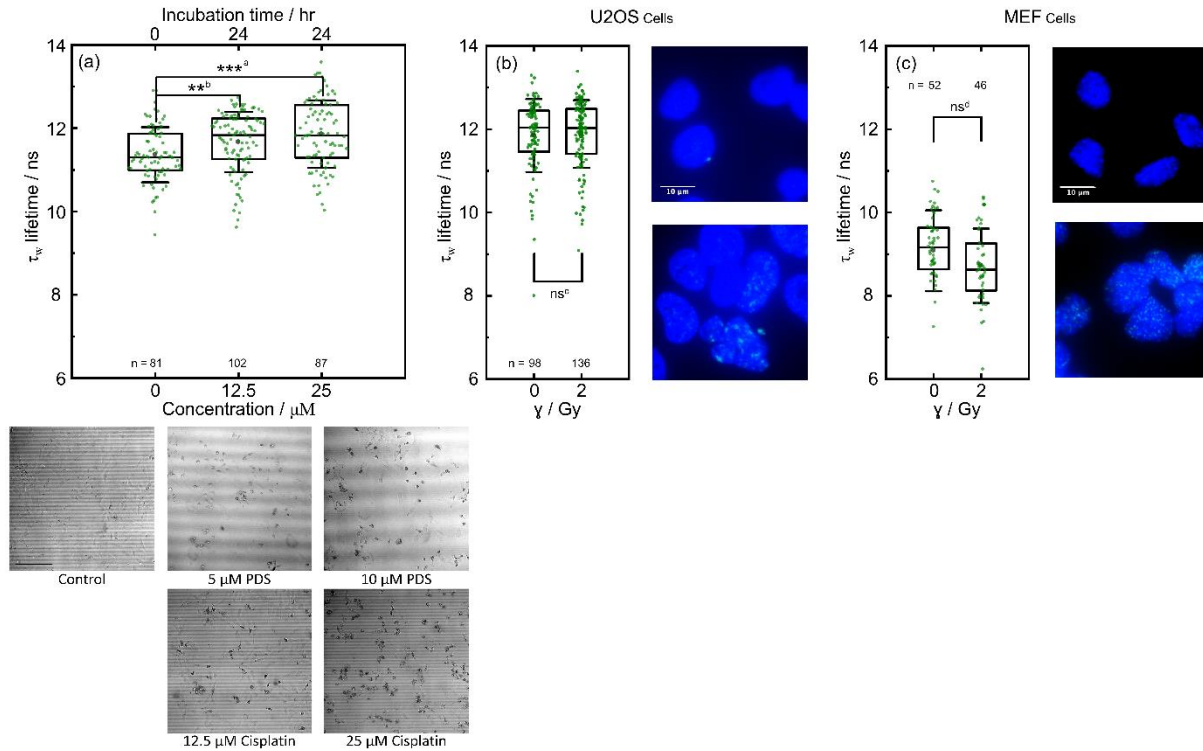

**Supplementary Figure 8.** (a) Top: Box plot showing the average lifetime ( $\tau_w$ ) of live U2OS cells stained with **DAOTA-M2** (20  $\mu$ M, 24 hr), and co-incubated with cisplatin (12.5 and 25  $\mu$ M). Results from n cells as stated next to each box, over two independent experiments.. Bottom: Representative brightfield images of U2OS cells after incubation with **DAOTA-M2** (20  $\mu$ M, 24 hr, Control) and co-incubation with PDS (5 and 10  $\mu$ M) and cisplatin (12.5 and 25  $\mu$ M), representative of the experiments in the top part. Scale bar: 200  $\mu$ m. Recorded using a 20x objective. (b) and (c) left: Box plot of mean nuclear lifetimes ( $\tau_w$ ) for wild type U2OS and MEF cells alongside equivalent cells exposed to 2 Gy gamma irradiation. Results from n cells as stated next to each box, over one experiment.. Right:  $\gamma$ H2AX immunostaining (green) of cells, with/without 2Gy gamma irradiation. Cells were fixed, permeabilised and stained with  $\gamma$ H2AX to reveal the dsDNA breaks resulting from 2Gy gamma irradiation. DAPI in blue. Scale bars: 10  $\mu$ m. Significance: ns  $p > 0.05$ , \*  $p < 0.05$ , \*\*  $p < 0.01$ , \*\*\*  $p < 0.001$ . <sup>a</sup>  $p = 2.4 \times 10^{-5}$ ,  $t = -4.3$ ,  $DF = 163$ ; <sup>b</sup>  $p = 4.0 \times 10^{-3}$ ,  $t = -3.0$ ,  $DF = 178$ . <sup>c</sup>  $p = 7.4 \times 10^{-1}$ ,  $t = -0.4$ ,  $DF = 199$ . <sup>d</sup>  $p = 5.8 \times 10^{-2}$ ,  $t = 1.9$ ,  $DF = 96$ .

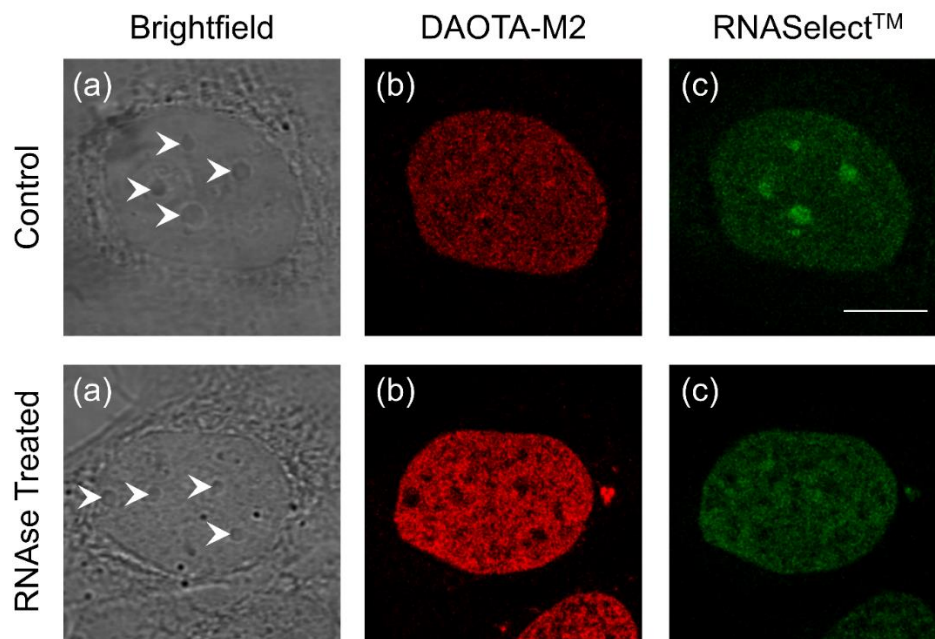

**Supplementary Figure 9.** RNAselect™ staining of fixed U2OS cells with and without RNAse treatment. Cells were incubated with **DAOTA-M2** (20  $\mu$ M, 24 hr) live before fixation, RNAse treatment and then RNAselect staining. (a) Brightfield image, nucleoli features are marked with a white arrow. (b) **DAOTA-M2** emission (red). (c) RNAselect™ emission (green). Both image intensities have been scaled to make the background DNA staining equivalent. Intense nucleoli staining can only be observed in the non-RNAse treated (control) cells. Result of one experiment. Scale bars: 10  $\mu$ m.

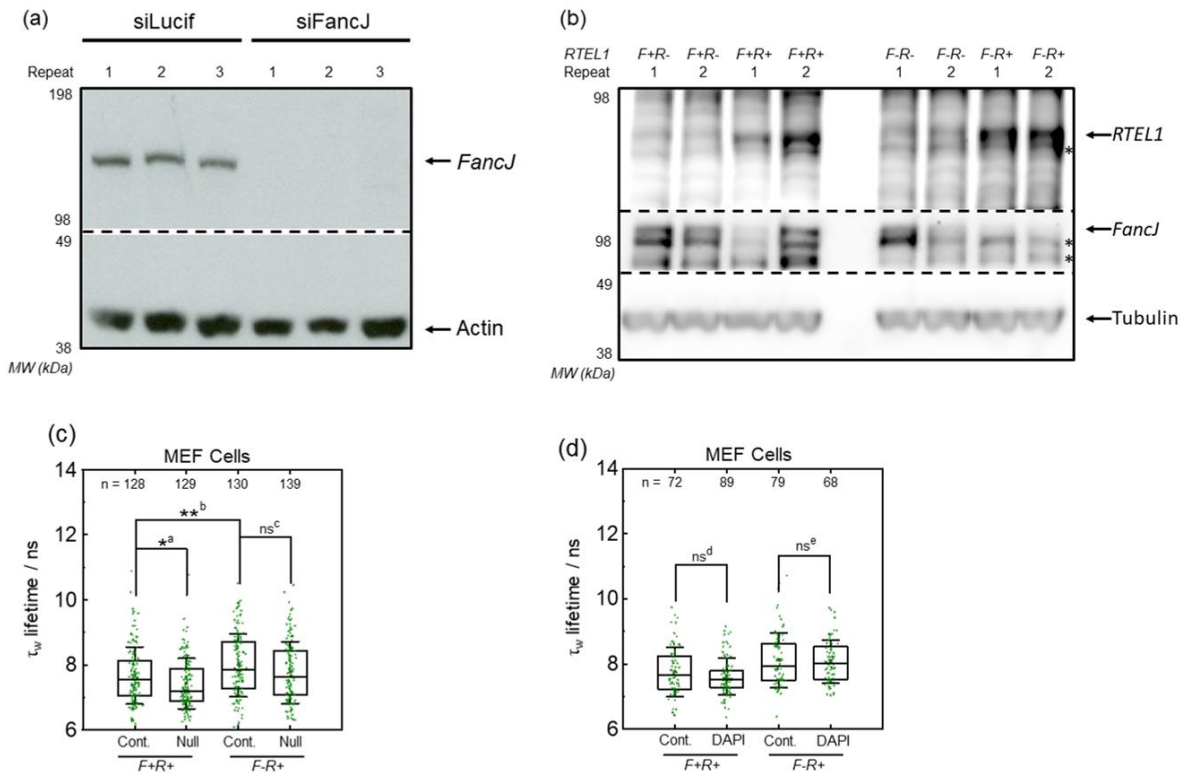

**Supplementary Figure 10.** (a) Whole-cell extracts from U2OS cells used in Figure 4(d), three independent experiments for each condition. Cells transfected with control (siLucif), or *FancJ* siRNA (siFancJ) were probed with antibodies against *FancJ* or actin (loading control) in Western blotting. Efficiency of knockdown calculated as 98.6% by obtaining ratio of *FancJ* intensity over Actin intensity for each lane, averaging over all three positive/negative experiments and finding the ratio of these averages. (b) Whole-cell extracts from MEF cells used in Figure 4(b), two independent experiments for each condition. Cells transfected with null adenovirus (*R+*), or transfected with CRE adenovirus (*R-*) to delete RTEL1 were probed with antibodies against *FancJ*, RTEL1 or tubulin (loading control) in Western blotting. *F+R+* = *FancJ*(+)/RTEL1(+), *F+R-* = *FancJ*(+)/RTEL1(-), *F-R+* = *FancJ*(-)/RTEL1(+), and *F-R-* = *FancJ*(-)/RTEL1(-). (c) Box plot of mean nuclear lifetimes ( $\tau_w$ ) of **DAOTA-M2** (20  $\mu$ M, 24 hr) of live MEF cells (*F+* and *F-*) infected with Null adenovirus compared with control cells without infection. Results from n cells as stated next to each box, over two independent experiments. (d) Box plot of mean nuclear lifetimes ( $\tau_w$ ) of **DAOTA-M2** (20  $\mu$ M, 24 hr) with no co-staining (Cont.) or co-staining with DAPI (90  $\mu$ M, 1 hr) in live MEF cells. Results from n cells as stated next to each box, over two independent experiments. Significance: ns  $p > 0.05$ , \*  $p < 0.05$ , \*\*  $p < 0.01$ , \*\*\*  $p < 0.001$ . <sup>a</sup>  $p = 1.6 \times 10^{-2}$ ,  $t = 2.4$ ,  $DF = 251$ . <sup>b</sup>  $p = 6.6 \times 10^{-3}$ ,  $t = -2.7$ ,  $DF = 254$ . <sup>c</sup>  $p = 6.0 \times 10^{-2}$ ,  $t = 1.9$ ,  $DF = 265$ . <sup>d</sup>  $p = 2.0 \times 10^{-1}$ ,  $t = 1.3$ ,  $DF = 129$ . <sup>e</sup>  $p = 7.5 \times 10^{-1}$ ,  $t = 0.3$ ,  $DF = 144$ .

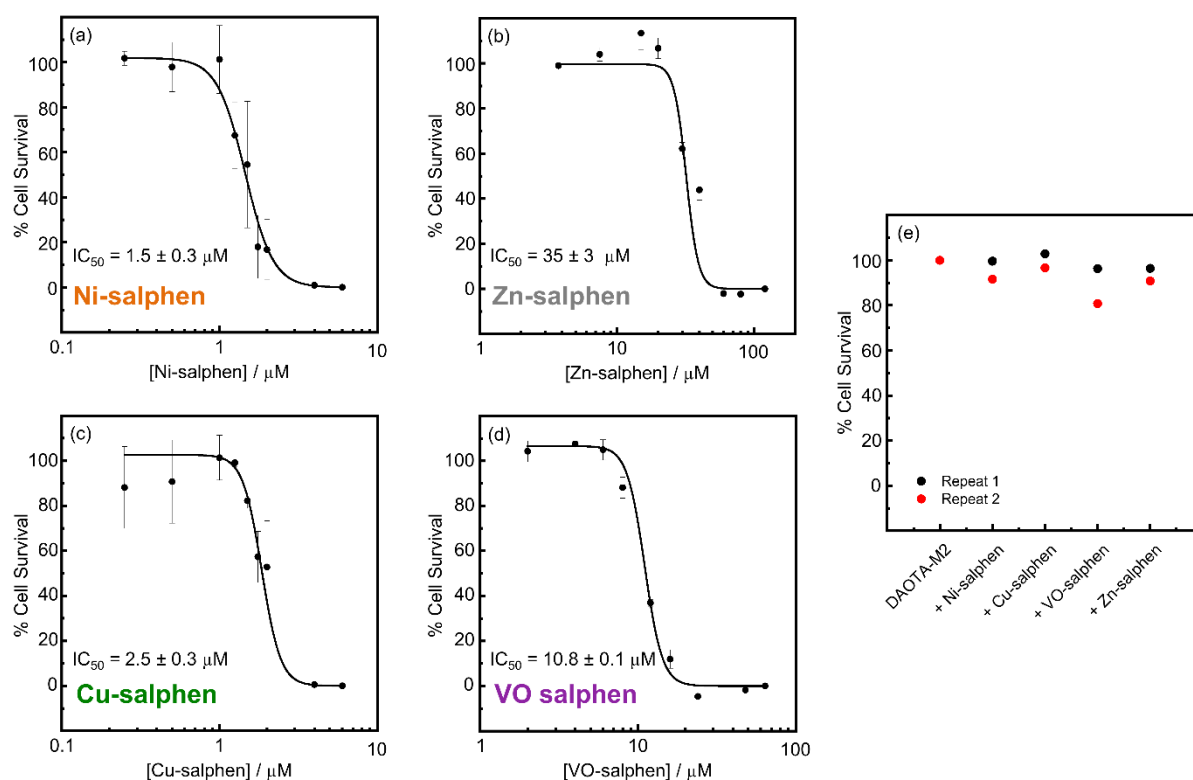

**Supplementary Figure 11.** Cell viability MTS assay of U2OS incubated with metal-salphen compounds used in this study. (a)-(d) Viability of cells at 24 hr in the presence of increasing concentrations of Ni-, Zn-, Cu-, and (d) VO-salphen. 100% and 0% viability are scaled as DMSO control, and maximum compound concentration, respectively. Mean is plotted; error bars are  $\pm$  standard deviation of three independent experiments. (e) Viability of cells at the conditions of co-incubation in Figure 5. Cells were treated with **DAOTA-M2** (20  $\mu\text{M}$ , 24 hr), then co-incubated with the metal salphens (1  $\mu\text{M}$ , 7 hr). 100% and 0% viability are scaled as **DAOTA-M2** only control, and no cells, respectively. Error bars are  $\pm$  standard deviation of two independent experiments.

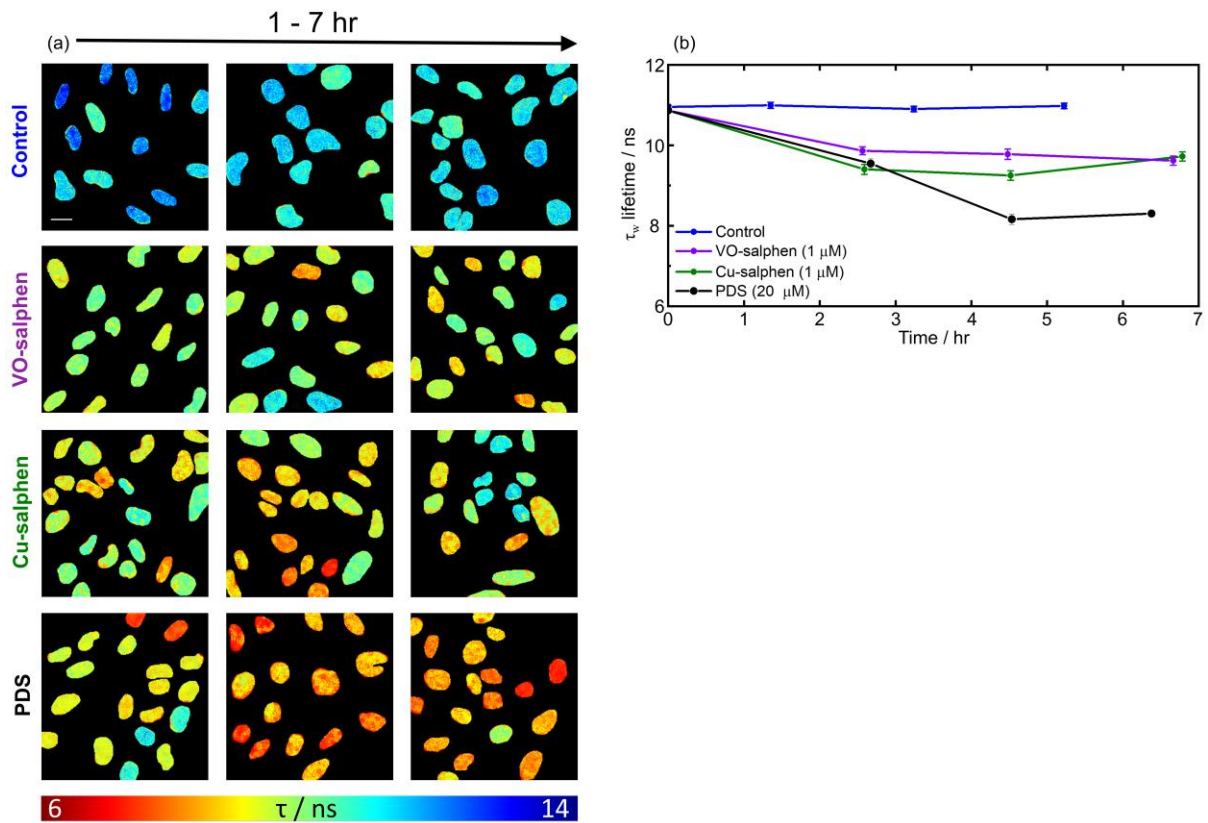

**Supplementary Figure 12.** FLIM analysis of nuclear DNA in live U2OS cells stained with **DAOTA-M2** (20  $\mu$ M, 24 hr), followed by co-incubation with VO- and Cu-salphen (1  $\mu$ M), and PDS (20  $\mu$ M). (a) Representative FLIM maps from **DAOTA-M2** emission following co-incubation with DMSO (Control), VO-, Cu-salphen, and PDS. Images representative of the experiments in (b). Colour scale shows lifetime from 6 (red) to 14 (blue) ns. Scale bar: 20  $\mu$ m. (b) Mean nuclear lifetimes ( $\tau_w$ ) during incubation, error bars are  $\pm$  standard error of mean. Sample size is n cells over two independent experiments. For the time zero data point, n = 623. For control (blue), n = 196, 219, 208. For VO Salphen (purple), n = 71, 67, 63. For Cu Salphen (green), n = 71, 81, 61. For PDS (black), n = 61, 20, 56. Values for n are stated from earliest time point to latest.
